# Supplementary material
Source: PubMed Central journal article supplement (PMC3161494)
Supplement: NIHMS307683-supplement-1_si_001.pdf [file NIHMS307683-supplement-1_si_001.pdf]

## Supplemental Material

**Supplemental Figure 1:** Distributions of the protein and peptide metrics (A) protein sequence count, (B) protein sequence coverage, (C) peptide precursor intensity, and (D) peptide XCorr.

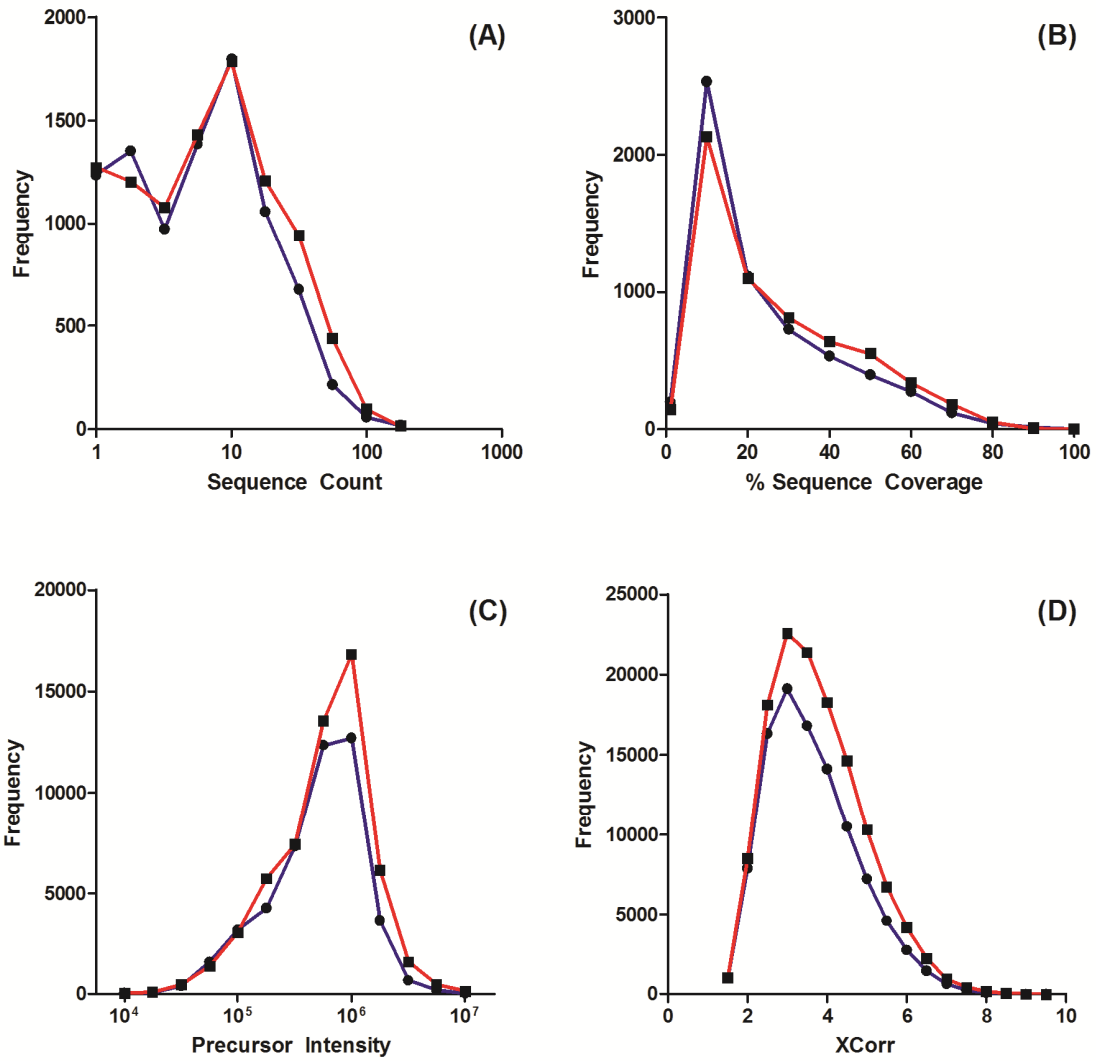

**Supplemental Figure 2:** PANTHER Protein Classes enriched at least 2-fold with ProteoMiner and  $p \leq 0.05$ .

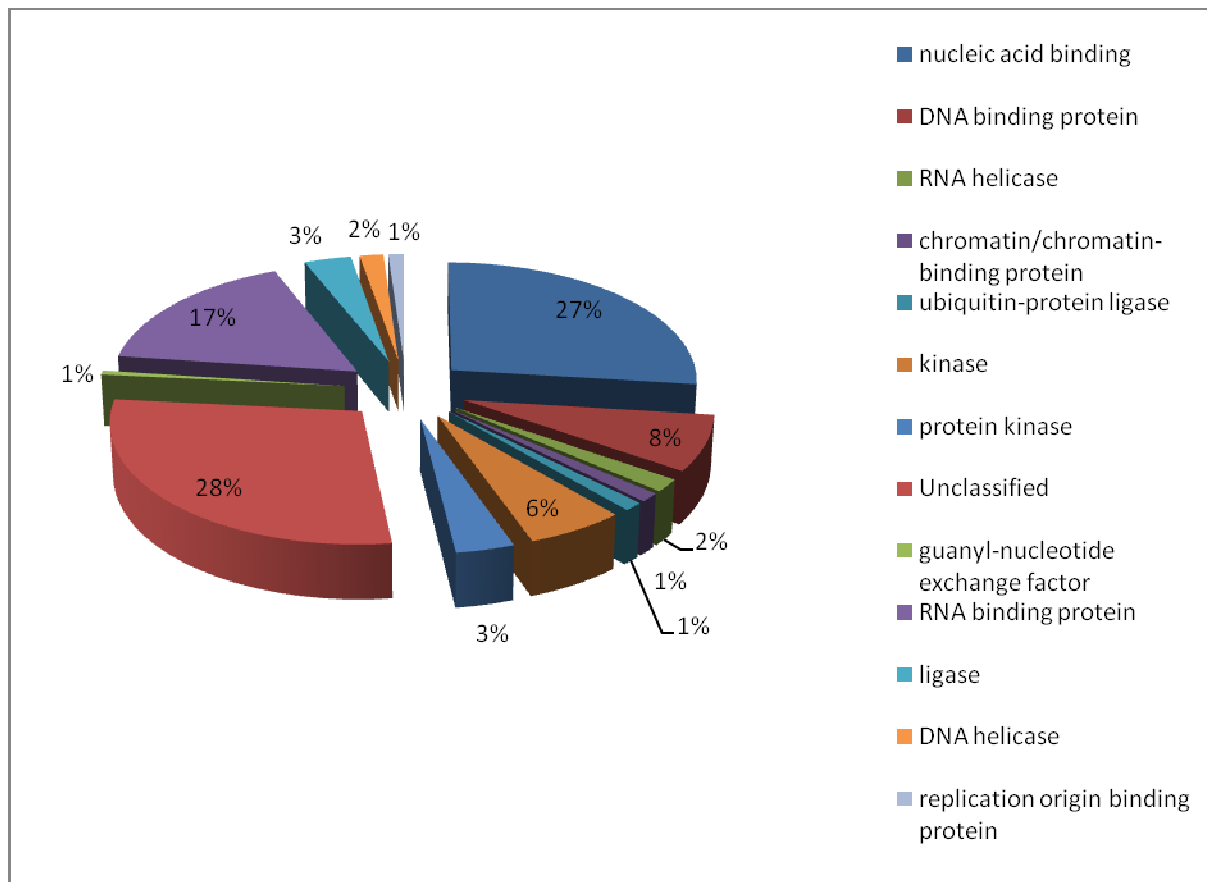

**Supplemental Figure 3:** PANTHER Protein Classes depleted at least 2-fold with ProteoMiner and  $p \leq 0.05$ .

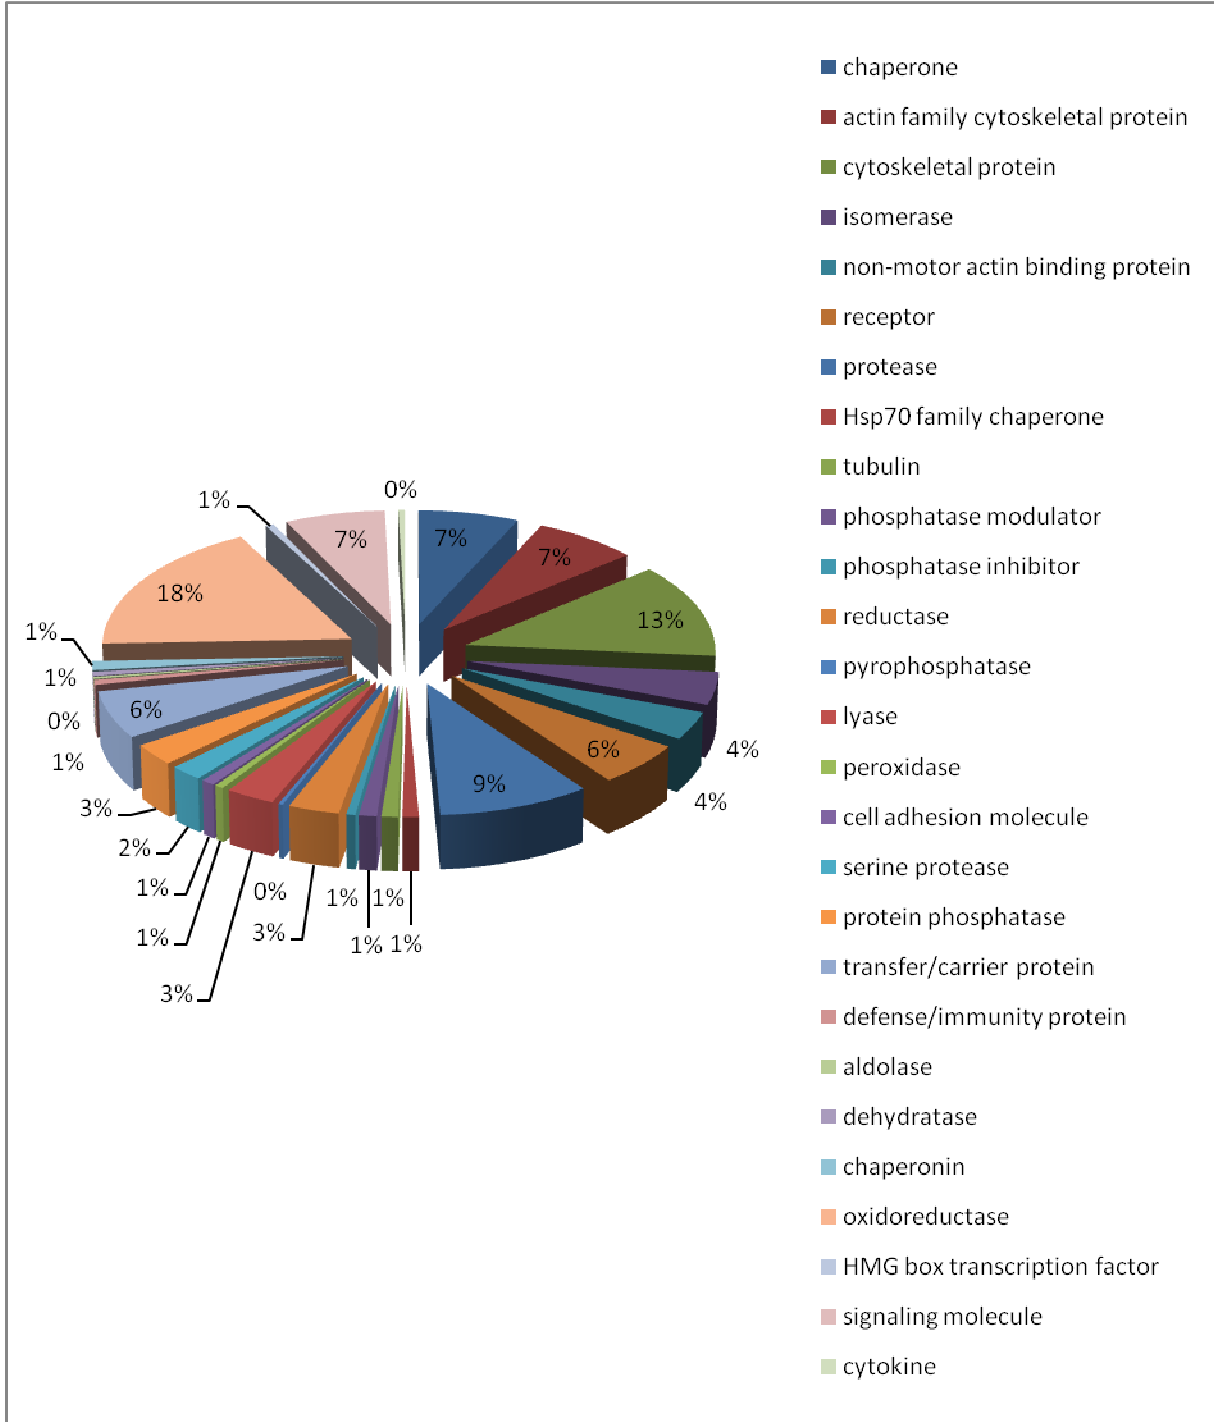

**Supplemental Figure 4:** Gene Ontology Molecular Function enriched at least 2-fold with ProteoMiner and  $p \leq 0.05$ .

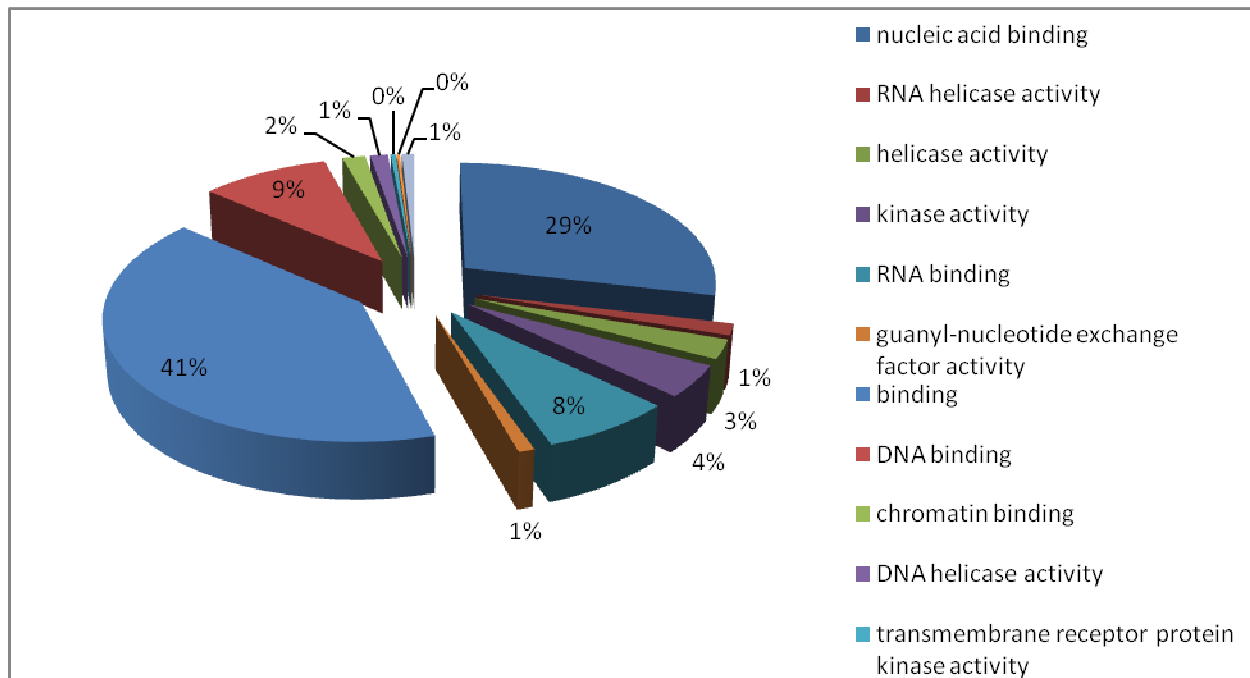

**Supplemental Figure 5:** Gene Ontology Cellular Component depleted at least 2-fold with ProteoMiner and  $p \leq 0.05$ .

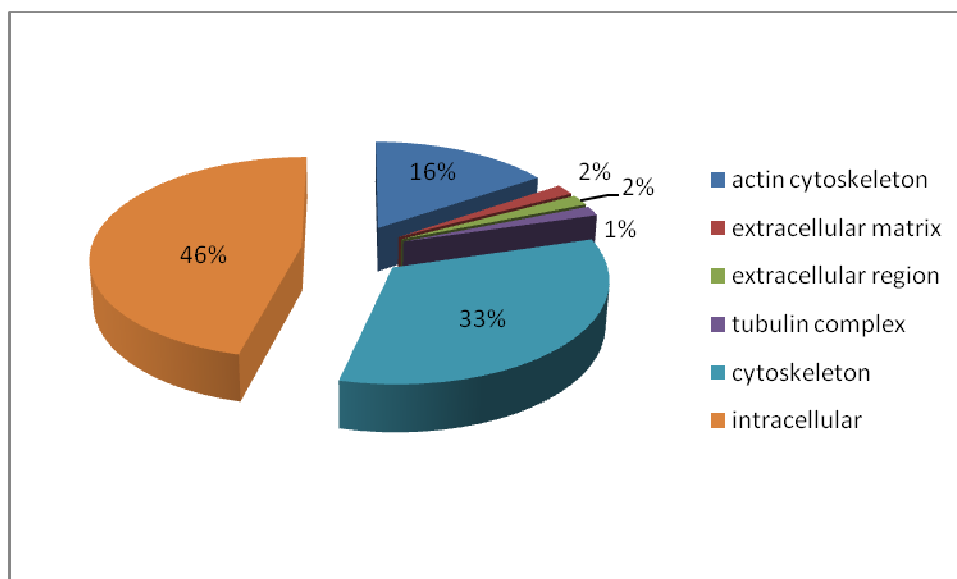

**Supplemental Figure 6:** Gene Ontology Biological Processes enriched at least 2-fold with ProteoMiner and  $p \leq 0.05$ .

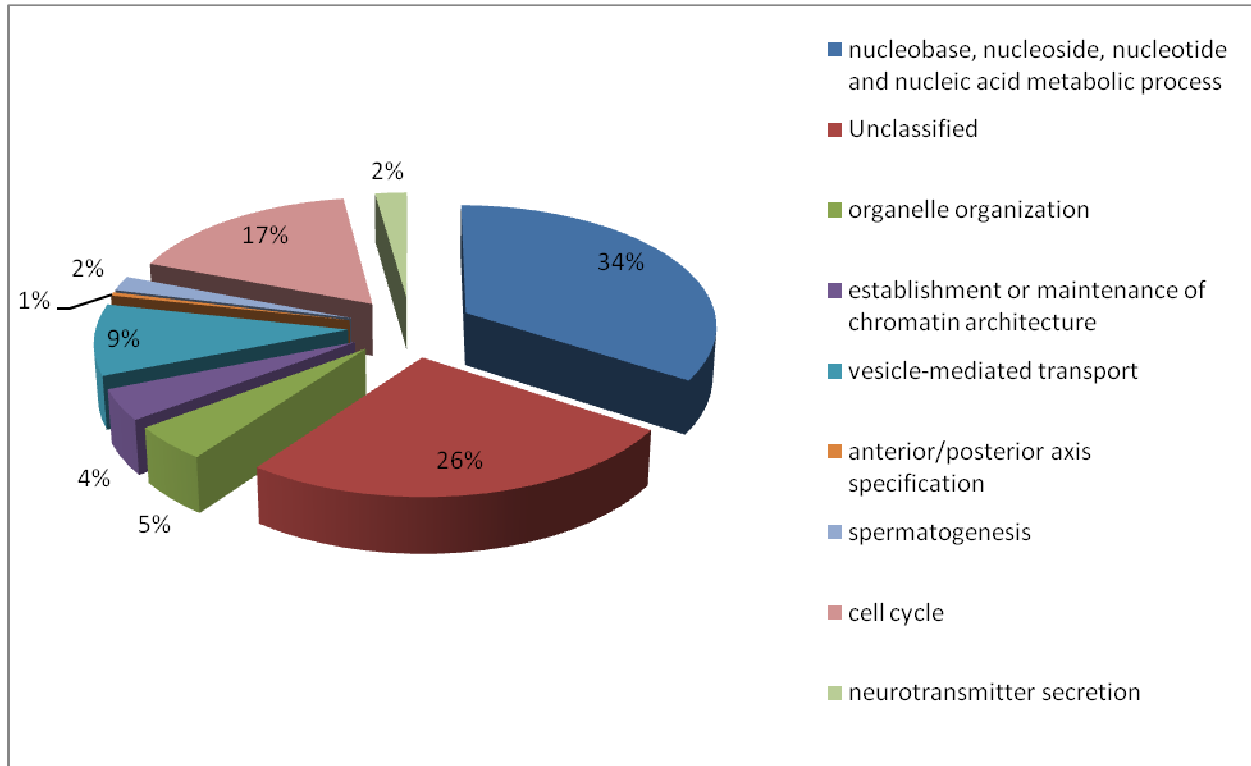

**Supplemental Figure 7:** Gene Ontology Biological Processes depleted at least 2-fold with ProteoMiner and  $p \leq 0.05$ .

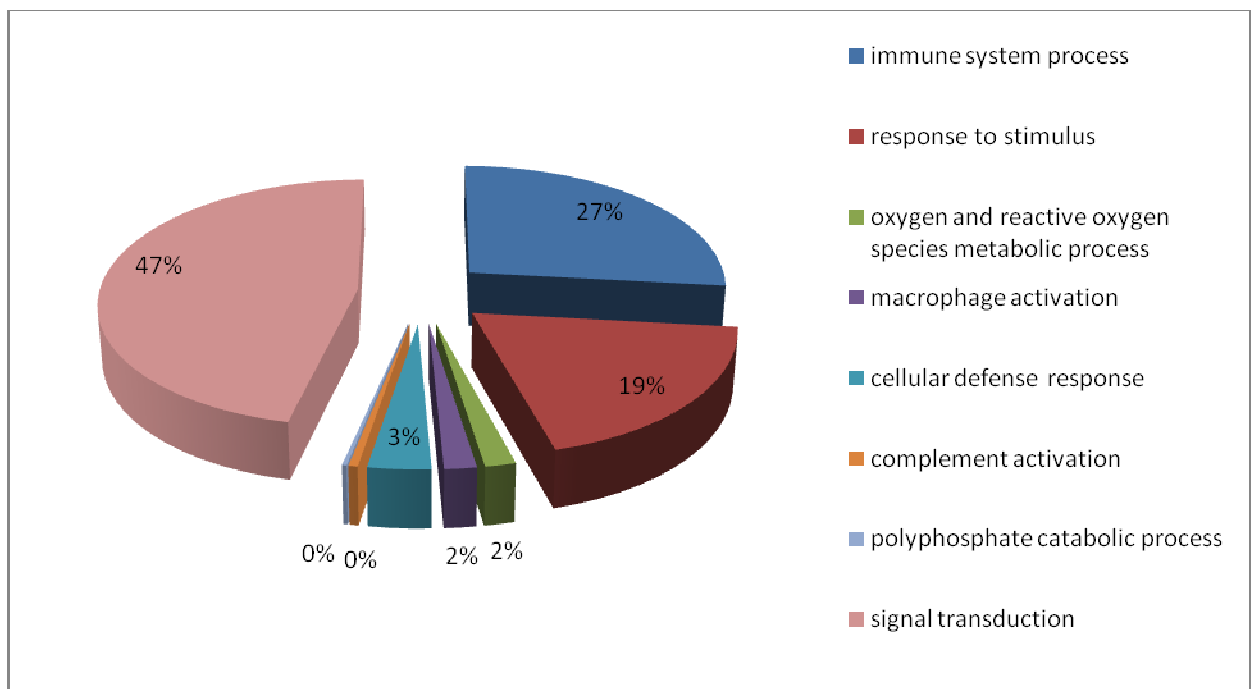

**Supplemental Figure 8:** Relative frequency of protein domains within proteins enriched at least two-fold based on spectral counts and found in at least 10 proteins.

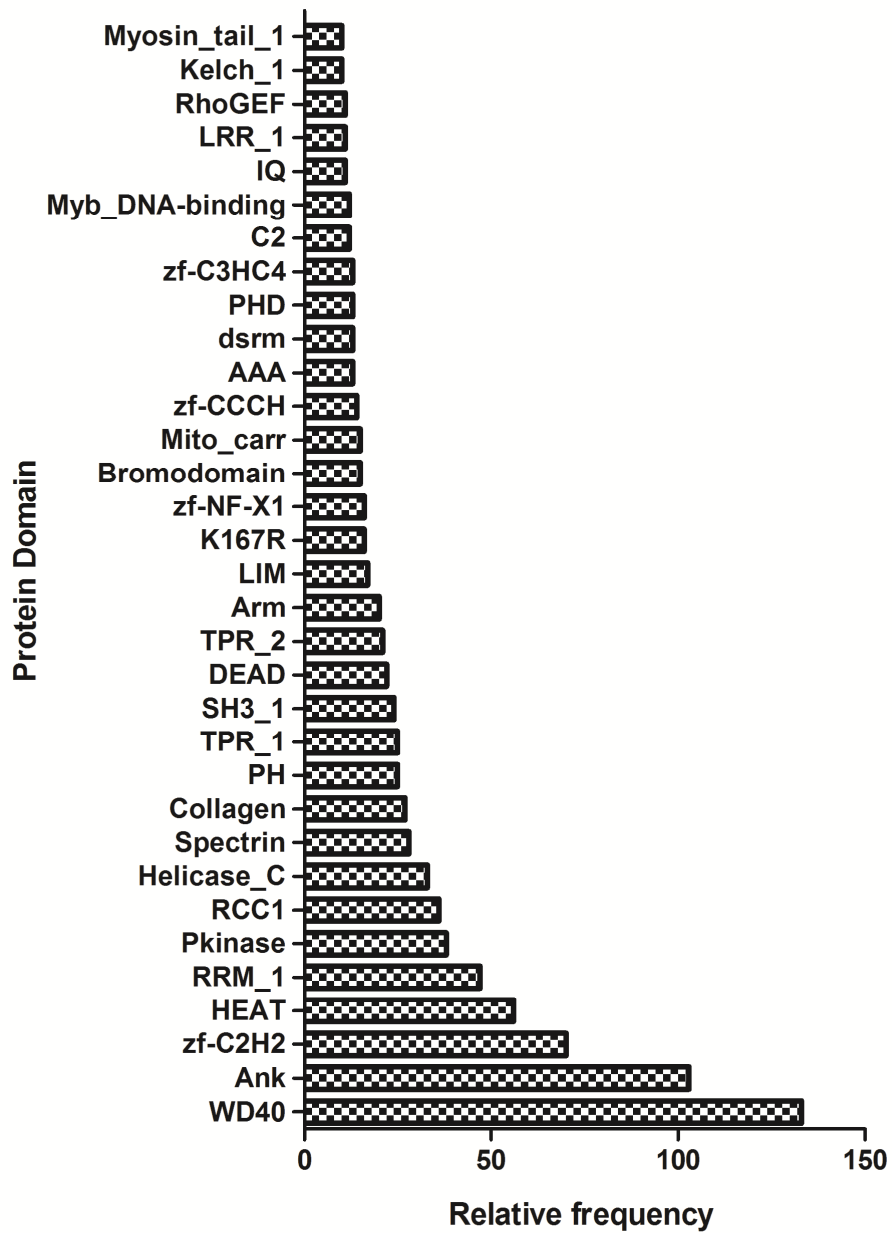

**Supplemental Figure 9:** Venn diagram of all proteins identified between Control and ProteoMiner runs

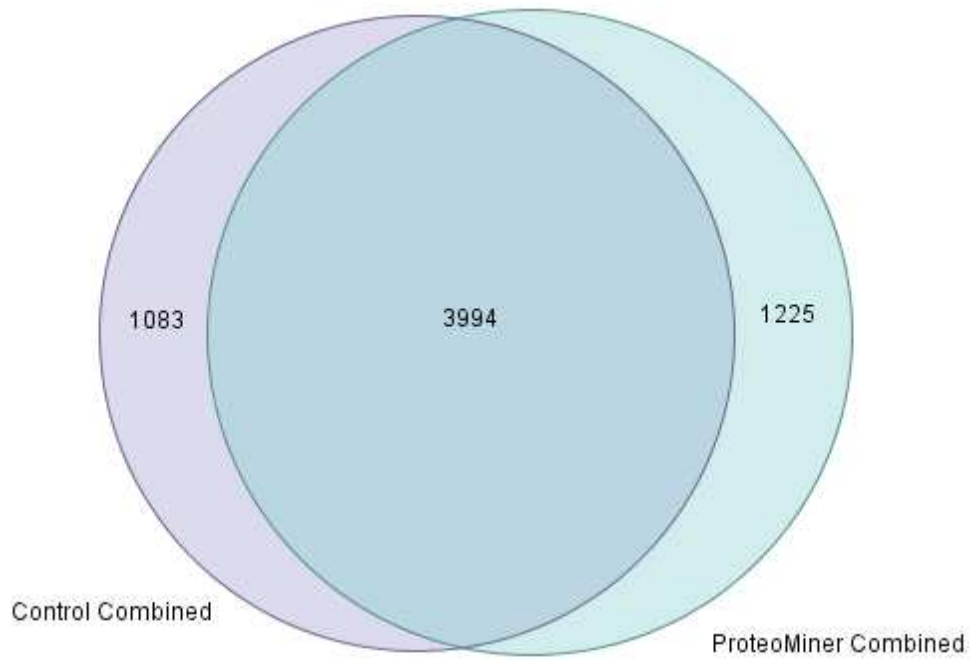

**Supplemental Figure 10:** Comparison of Venn diagrams between triplicate Control and ProteoMiner runs

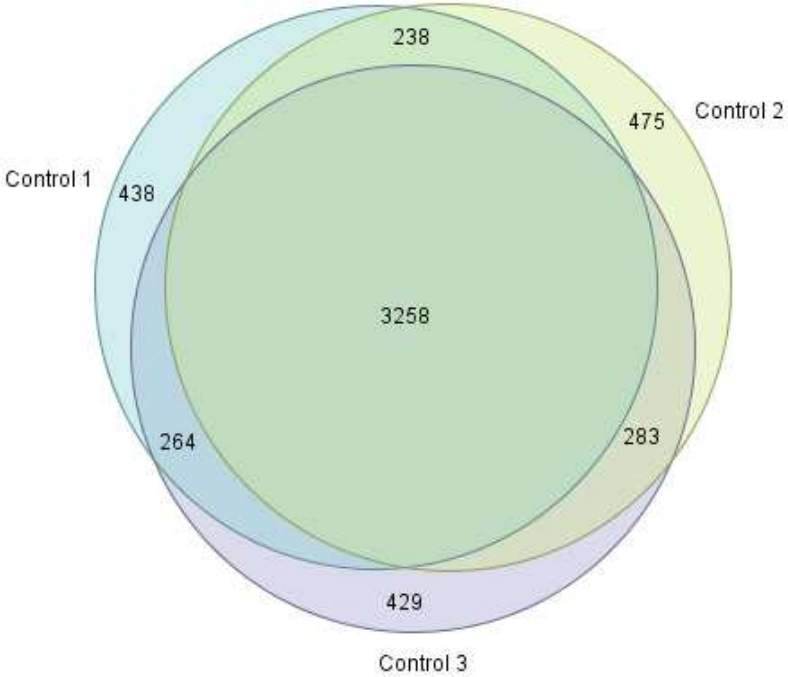



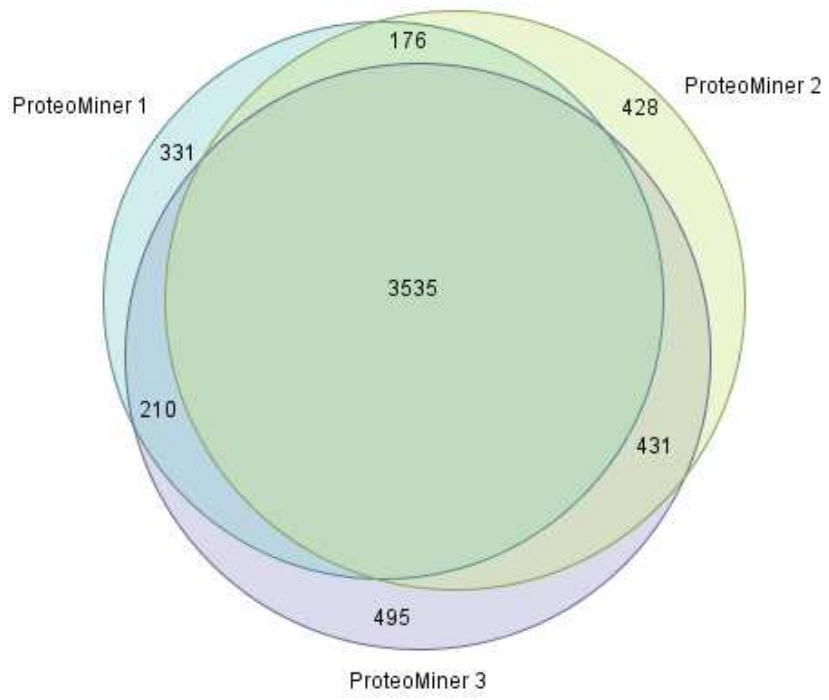

**Supplemental Table 1:** List of Gene Ontology Biological Processes unchanged (-2 to 2-fold change) by ProteoMiner or with  $p > 0.05$ .

vitamin biosynthetic process

response to stress

nucleobase, nucleoside, nucleotide and nucleic acid transport

gamete generation

cell adhesion

cellular amino acid and derivative metabolic process

reproduction

exocytosis

neurological system process

apoptosis

immune response

coenzyme metabolic process

defense response to bacterium

vitamin catabolic process

vitamin metabolic process

cell communication

pattern specification process

antigen processing and presentation of peptide or polysaccharide antigen via MHC class II

natural killer cell activation

blood circulation

response to interferon-gamma

endocytosis

antigen processing and presentation  
carbohydrate metabolic process  
protein metabolic process  
transport  
heart development  
lysosomal transport  
endoderm development  
meiosis  
chromosome segregation  
carbohydrate transport  
cellular component morphogenesis  
anatomical structure morphogenesis  
system development  
tricarboxylic acid cycle  
protein transport  
intracellular protein transport  
nervous system development  
mitosis  
skeletal system development  
sulfur metabolic process  
amino acid transport  
generation of precursor metabolites and energy  
porphyrin metabolic process  
fertilization  
cell motion

anion transport  
response to toxin  
cell-cell adhesion  
cellular component organization  
sensory perception of sound  
muscle contraction  
peroxisomal transport  
regulation of liquid surface tension  
regulation of phosphate metabolic process  
response to external stimulus  
blood coagulation  
system process  
vitamin transport  
cation transport  
metabolic process  
cell-matrix adhesion  
embryonic development  
mitochondrion organization  
muscle organ development  
sex determination  
asymmetric protein localization  
protein localization  
cell-cell signaling  
ectoderm development  
negative regulation of apoptosis

induction of apoptosis  
phosphate metabolic process  
mesoderm development  
regulation of biological process  
regulation of vasoconstriction  
oxidative phosphorylation  
cell surface receptor linked signal transduction  
phosphate transport  
sensory perception  
respiratory electron transport chain  
cellular glucose homeostasis  
response to pheromone  
cellular calcium ion homeostasis  
B cell mediated immunity  
nuclear transport  
lipid metabolic process  
intracellular signaling cascade  
lipid transport  
developmental process  
mammary gland development  
nitrogen compound metabolic process  
extracellular transport  
ferredoxin metabolic process  
segment specification  
nitric oxide biosynthetic process

hemopoiesis  
homeostatic process  
localization  
angiogenesis  
cytokinesis  
ion transport  
RNA localization  
female gamete generation  
synaptic transmission  
primary metabolic process  
acyl-CoA metabolic process  
dorsal/ventral axis specification  
visual perception  
cellular process

**Supplemental Table 2:** List of PANTHER Protein Classes unchanged (-2 to 2-fold change) by ProteoMiner or with  $p > 0.05$ .

histone  
intermediate filament binding protein  
intermediate filament  
aspartic protease  
endodeoxyribonuclease  
Hsp90 family chaperone  
translation factor  
actin and actin related protein

antibacterial response protein  
transferase  
zinc finger transcription factor  
potassium channel  
acyltransferase  
cytokine receptor  
methyltransferase  
sodium channel  
calcium-binding protein  
amino acid kinase  
homeobox transcription factor  
helix-turn-helix transcription factor  
KRAB box transcription factor  
TGF-beta receptor  
mutase  
transaldolase  
phosphodiesterase  
extracellular matrix protein  
ATP synthase  
kinase inhibitor  
cysteine protease  
glycosyltransferase  
DNA polymerase processivity factor  
primase  
DNA ligase

metalloprotease  
G-protein modulator  
protease inhibitor  
major histocompatibility complex antigen  
ribosomal protein  
acetyltransferase  
extracellular matrix glycoprotein  
phosphatase activator  
deaminase  
ribonucleoprotein  
cell junction protein  
microtubule binding motor protein  
enzyme modulator  
immunoglobulin receptor superfamily  
glucosidase  
transporter  
cation transporter  
microtubule family cytoskeletal protein  
intracellular calcium-sensing protein  
calmodulin  
peptide hormone  
carbohydrate phosphatase  
growth factor  
DNA glycosylase  
amylase



phosphatase  
extracellular matrix structural protein  
RNA methyltransferase  
phospholipase  
non-motor microtubule binding protein  
kinase activator  
surfactant  
apolipoprotein  
dehydrogenase  
centromere DNA-binding protein  
amino acid transporter  
glycosidase  
nuclear hormone receptor  
nuclease  
anion channel  
cysteine protease inhibitor  
oxygenase  
phosphorylase  
membrane-bound signaling molecule  
ion channel  
basic leucine zipper transcription factor  
CREB transcription factor  
DNA topoisomerase  
nucleotide phosphatase  
exoribonuclease

aminoacyl-tRNA synthetase  
storage protein  
serine protease inhibitor  
tight junction  
kinase modulator  
membrane trafficking regulatory protein  
vesicle coat protein  
membrane traffic protein  
transaminase  
heterotrimeric G-protein  
esterase  
SNARE protein  
DNA methyltransferase  
epimerase/racemase  
DNA-directed DNA polymerase  
transketolase  
G-protein  
annexin  
transmembrane receptor regulatory/adaptor protein  
damaged DNA-binding protein  
small GTPase  
DNA-directed RNA polymerase  
endoribonuclease  
nucleotide kinase  
basic helix-loop-helix transcription factor

hydrolase

ATP-binding cassette (ABC) transporter

structural protein

nucleotidyltransferase

carbohydrate transporter

ligand-gated ion channel

mRNA processing factor

decarboxylase

hydroxylase

oxidase

transcription factor

carbohydrate kinase

G-protein coupled receptor

mitochondrial carrier protein

transcription cofactor

lipase

helicase
